# Supplementary material for: An electrochemical immunosensor for ultrasensitive detection of HBsAg based on platinum nanoparticles loaded on natural montmorillonite
Source: Royal Society of Chemistry journal article supplement (doi:10.1039/c5ay01574j), 2015-01-01
Supplement: c5ay01574j1.pdf [file c5ay01574j1.pdf]

**Table 1** Determination of HBsAg in human serum sample by the proposed immunosensor.

| Sample | Added<br>(ng/mL) | Found<br>(n=5, ng/mL)                      | Average<br>(ng/mL) | RSD<br>(n=5, %) | Recovery<br>(%) |
|--------|------------------|--------------------------------------------|--------------------|-----------------|-----------------|
| 1      | 0                | 0.1657, 0.17065, 0.1623,<br>0.1644, 0.1564 | 0.164              | 3.151           | -               |
| 2      | 0.25             | 0.4192, 0.4056, 0.4006<br>0.4478, 0.4106   | 0.417              | 4.482           | 101.2           |
| 3      | 4.00             | 4.2012, 4.2711, 4.2360<br>3.8364, 4.2535   | 4.159              | 4.388           | 99.89           |
| 4      | 8.00             | 8.4063, 7.9015, 7.9670,<br>8.1669, 8.4411  | 8.177              | 3.011           | 100.2           |

Table. S1 The reproducibility test with different concentrations

| Concentration<br>(ng/mL) | Found<br>(ng/mL)                                                                         | Average<br>(n=11, ng/mL) | RSD<br>(n=11, %) |
|--------------------------|------------------------------------------------------------------------------------------|--------------------------|------------------|
| 0.05                     | 0.0475, 0.0520, 0.0475, 0.050,<br>0.0475, 0.0475, 0.0525, 0.047,<br>0.049, 0.0535, 0.049 | 0.0494                   | 4.7              |
| 0.5                      | 0.489, 0.485, 0.512, 0.504,<br>0.464, 0.516, 0.473, 0.495,<br>0.466, 0.534, 0.477        | 0.492                    | 4.5              |
| 5                        | 5.17, 4.98, 5.24, 4.88, 5.32,<br>5.05, 4.82, 5.11, 5.37, 5.30,<br>5.39                   | 5.15                     | 3.8              |
